# Supplementary material
Source: Springer Nature journal article supplement (https://www.springermedizin.de/resource/supplementary/12913_2011_1883_MOESM3_ESM.pdf/9529162)

**PH at arrival with Serious Evolution**

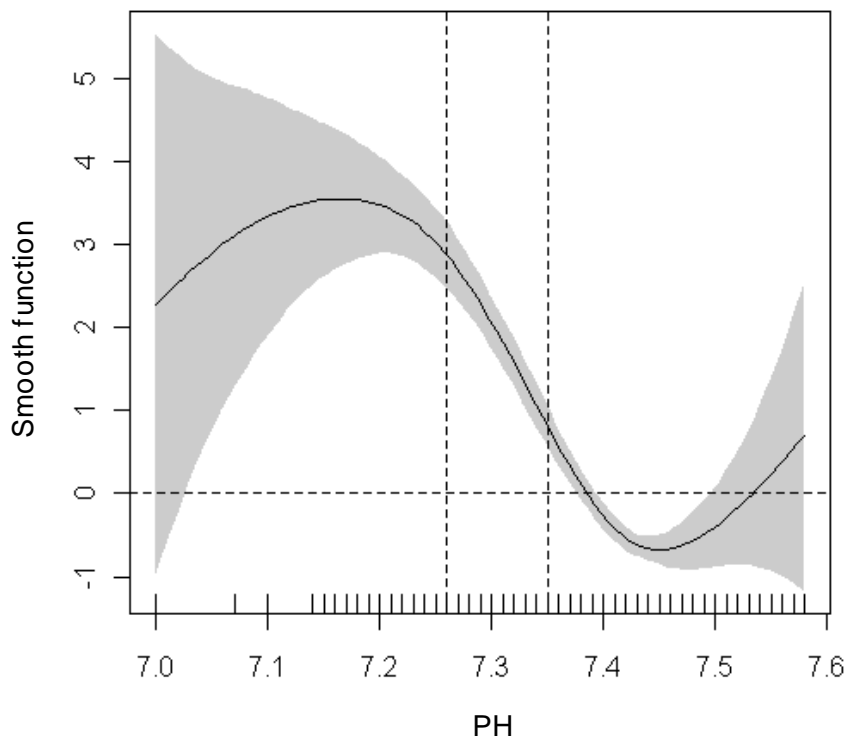

**PH at decision time with Serious Evolution**

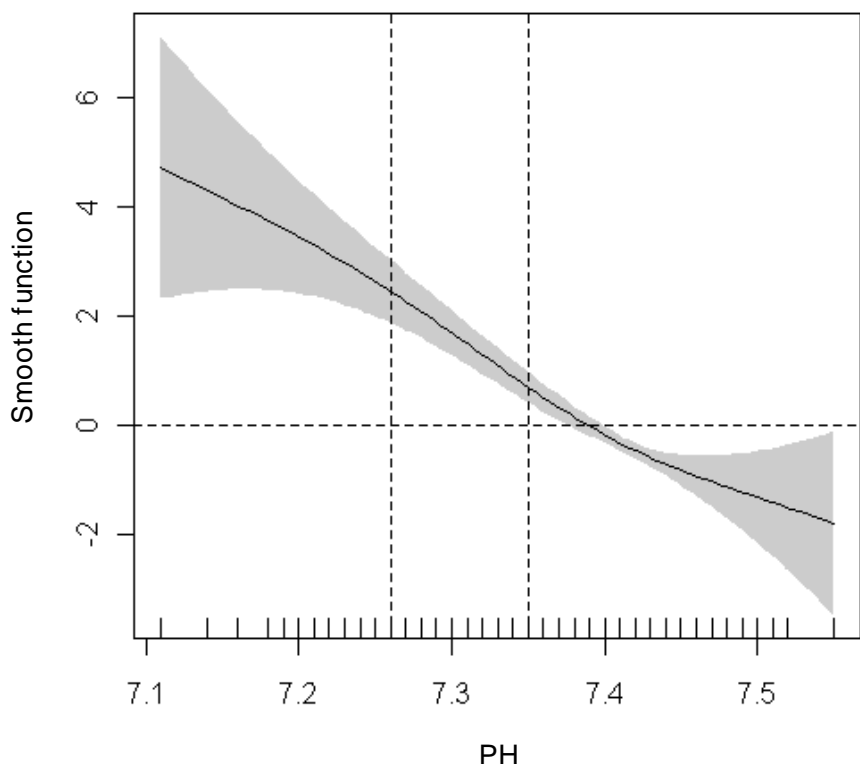

Supplement: MOESM3 [file 9529162]
